# Supplementary material for: Do historical sediments of pulp and paper industry contribute to the exposure of fish caged in receiving waters?
Source: Royal Society of Chemistry journal article supplement (doi:10.1039/b922532c), 2010-01-01
Supplement: b922532c-1.pdf [file b922532c-1.pdf]

Supplementary data

Table 1. Liver genes of juvenile brown trout expressed differently up- or down due to 10-day caging at various distances from the pulp and paper mill “Kaukas”, Southern Lake Saimaa (Finland) or at two depths of water, in contact to sediment and three meters from the water surface, in comparison with the reference site 10 km upstream. Data are  $\log_2(\text{expression ratio})$ , NS – not significant.

| Accession | Gene                                           | Bottom | Bottom | Bottom | Bottom | Surface | Surface | Surface | Surface |
|-----------|------------------------------------------------|--------|--------|--------|--------|---------|---------|---------|---------|
|           |                                                | 5 km   | 8 km   | 14 km  | 17 km  | 5 km    | 8 km    | 14 km   | 17 km   |
| CA371480  | 60S acidic ribosomal protein P2                | NS     | NS     | 0.27   | 0.50   | NS      | NS      | 0.59    | -0.72   |
| CA381199  | 94 kDa glucose-regulated protein               | NS     | NS     | -0.54  | NS     | -0.23   | NS      | -0.39   | 0.64    |
| DY737446  | Apolipoprotein A-IV                            | NS     | -0.41  | NS     | NS     | 0.84    | NS      | NS      | 1.26    |
| CA348325  | BAG-family molecular chaperone regulator-4     | NS     | -0.36  | NS     | -0.44  | 0.65    | NS      | -0.19   | 0.81    |
| CF753046  | Cytochrome b-1                                 | NS     | NS     | 1.02   | NS     | NS      | NS      | 0.55    | 0.82    |
| CA358725  | Cytosolic nonspecific dipeptidase              | NS     | -1.12  | -0.31  | 0.26   | 0.71    | NS      | -0.41   | 0.90    |
| DV200529  | Fructose-bisphosphate aldolase A               | NS     | -0.51  | -0.69  | NS     | 0.75    | -0.27   | -0.92   | 0.70    |
| CU071907  | Fumarate hydratase, mitochondrial precursor    | NS     | 0.36   | NS     | 0.65   | -0.36   | 0.63    | 0.39    | -0.30   |
| CA353121  | GRB2-related adaptor protein 2                 | NS     | -1.21  | -0.35  | 0.33   | 0.85    | NS      | -0.77   | 1.14    |
| CA381971  | Histone H33-1                                  | NS     | NS     | NS     | NS     | -0.51   | NS      | 0.45    | -0.54   |
| CA372743  | Hypothetical-fish 1                            | NS     | NS     | -0.40  | NS     | 0.63    | NS      | -0.67   | 0.48    |
| CA375247  | Hypothetical-fish 36                           | NS     | -0.62  | -0.24  | -0.51  | NS      | NS      | -0.76   | NS      |
| BX076136  | Hypoxanthine-guanine phosphoribosyltransferase | NS     | -0.34  | -0.46  | NS     | 0.73    | NS      | -0.56   | NS      |

|          |                                             |    |       |       |       |       |       |       |       |
|----------|---------------------------------------------|----|-------|-------|-------|-------|-------|-------|-------|
| CA372588 | Inhibitor of apoptosis protein 2            | NS | NS    | NS    | -1.19 | 0.44  | NS    | NS    | NS    |
| ES325958 | Lysozyme cluster                            | NS | -0.44 | NS    | 0.77  | 0.61  | -0.23 | NS    | 1.04  |
| CX151724 | Macrophage receptor MARCO                   | NS | -1.23 | -0.81 | NS    | 0.77  | NS    | -1.03 | 1.30  |
| CA346979 | MAPK/ERK kinase kinase 5-1                  | NS | NS    | -0.50 | 0.25  | NS    | NS    | -0.75 | 0.62  |
| BX859583 | Megakaryocyte stimulating factor            | NS | -0.21 | NS    | -1.26 | 0.81  | NS    | NS    | 0.52  |
| CA368716 | Membrane-bound transcription factor site 2  | NS | -0.31 | -0.24 | -0.42 | 0.44  | NS    | -0.73 | 0.97  |
| CF752699 | Metallothionein A                           | NS | 0.48  | NS    | 0.56  | -0.36 | 0.74  | 0.33  | NS    |
| CB492144 | Myristoylated alanine-rich protein kinase C | NS | 0.48  | NS    | 0.37  | -0.55 | 0.78  | NS    | -0.39 |
| EG756231 | NADH dehydrogenase subunit 5-2              | NS | -0.52 | NS    | NS    | 0.61  | NS    | NS    | 0.69  |
| CA385900 | Nonhistone chromosomal protein HMG-17       | NS | 0.43  | NS    | NS    | -0.44 | 0.69  | NS    | -0.91 |
| CA357173 | Peptidyl-prolyl cis-trans isomerase 2-2     | NS | -0.75 | -0.32 | NS    | 1.07  | -0.47 | -0.79 | 1.05  |
| BX084567 | PEST-containing nuclear protein             | NS | -0.55 | -0.45 | NS    | 0.70  | NS    | -0.78 | 0.75  |
| CX147525 | Prostaglandin D synthase homolog            | NS | 0.52  | 0.15  | 0.26  | NS    | 0.36  | 0.37  | -0.51 |
| CB496708 | TATA-binding protein associated factor 2N   | NS | 0.78  | NS    | 0.19  | -0.91 | 0.61  | NS    | -0.67 |
| BX883521 | T-cell lymphoma associated antigen se33-1   | NS | -0.29 | NS    | -0.35 | 0.64  | NS    | -0.29 | 0.66  |
| BX078840 | T-cell receptor alpha chain V region        | NS | 0.22  | NS    | 0.66  | -0.47 | 0.50  | NS    | -0.61 |
| CX262645 | Unknown-121                                 | NS | 0.46  | 0.15  | NS    | -0.85 | NS    | NS    | -0.78 |
| BX882217 | Unknown-132                                 | NS | -0.43 | -0.46 | -0.42 | 0.78  | -0.31 | -0.64 | 0.87  |
| CX256045 | Unknown-197                                 | NS | 0.63  | 0.20  | NS    | -0.68 | NS    | 0.53  | -0.57 |
| CX247269 | Unknown-198                                 | NS | 0.63  | 0.11  | 0.41  | -0.44 | 0.54  | 0.19  | NS    |
| CA387618 | Unknown-223                                 | NS | -0.72 | NS    | NS    | 0.47  | NS    | NS    | 0.56  |
| utu01b01 | Unknown-230                                 | NS | 0.80  | NS    | 0.24  | -0.86 | 0.64  | NS    | -0.57 |
| utu02d01 | Unknown-241                                 | NS | NS    | -0.17 | -1.58 | 0.76  | -0.69 | -0.72 | 0.70  |

|            |                                        |      |       |       |       |      |       |       |      |
|------------|----------------------------------------|------|-------|-------|-------|------|-------|-------|------|
| CR372483   | Unknown-33                             | NS   | 0.38  | NS    | -0.87 | 0.55 | -0.22 | -0.66 | 0.84 |
| DW536441   | Unknown-40                             | NS   | -0.90 | 0.14  | -1.66 | 1.47 | -0.20 | -0.64 | 1.22 |
| EST1-3AG03 | Unknown-74                             | NS   | -2.03 | -0.55 | NS    | 1.40 | -0.91 | -1.06 | NS   |
| EXOB3_E03  | Unknown-114                            | 2.43 | 1.31  | NS    | -2.42 | 1.88 | -0.33 | -1.23 | 1.36 |
| CA382570   | Mitogen-activated protein kinase 13    | 2.18 | 0.53  | -0.27 | -0.94 | 1.44 | NS    | -1.38 | 1.00 |
| DY737056   | Transposase-1                          | 2.07 | 0.36  | NS    | -0.75 | 0.86 | -0.32 | -1.08 | NS   |
| P_57       | RIB700                                 | 2.04 | 1.11  | 0.26  | -2.23 | 0.59 | NS    | NS    | 0.80 |
| CA040613   | Transposase-4                          | 2.02 | 0.92  | 0.15  | -1.75 | 0.94 | -0.35 | -0.97 | 0.65 |
| EG896573   | Unknown-30                             | 1.94 | 1.03  | 0.13  | -1.16 | 1.13 | NS    | -0.92 | NS   |
| DY720828   | Unknown-70                             | 1.75 | 0.69  | NS    | -2.11 | 1.15 | NS    | -0.89 | 1.14 |
| CA346691   | ReO_6-1                                | 1.74 | 1.20  | 0.19  | -3.09 | 0.86 | NS    | NS    | NS   |
| DY710914   | Peptidyl-prolyl cis-trans isomerase-7  | 1.60 | 0.99  | 0.15  | -0.92 | 1.13 | NS    | -0.71 | NS   |
| KVkm2_F01  | Unknown-224                            | 1.46 | 0.45  | NS    | -1.16 | 1.00 | -0.33 | -0.68 | 0.67 |
| CA383564   | Coatmer epsilon subunit 1              | 1.43 | 0.66  | 0.21  | -1.62 | 0.90 | -0.40 | -0.85 | 0.41 |
| CR370883   | Hpa repeat-2                           | 1.40 | 0.29  | NS    | -0.94 | 1.24 | NS    | -1.15 | 0.92 |
| CK873537   | Unknown-220                            | 1.37 | NS    | NS    | -0.65 | 1.63 | -0.43 | -1.05 | 1.17 |
| CX717338   | Transposase-5                          | 1.36 | 0.78  | 0.35  | -1.38 | 1.29 | NS    | -0.73 | NS   |
| CA038503   | Unknown-218                            | 1.34 | 0.87  | NS    | -0.55 | 0.81 | 0.32  | -0.78 | NS   |
| EL558025   | Unknown-75                             | 1.28 | 0.48  | 0.24  | -1.43 | 0.55 | NS    | -0.38 | NS   |
| DW564653   | Hpa repeat-1                           | 1.27 | NS    | NS    | -1.57 | 1.44 | -0.73 | -1.44 | 1.67 |
| CA357217   | Ubiquitin ligase protein CHFR          | 1.08 | 0.82  | NS    | -1.05 | 0.63 | NS    | NS    | 0.57 |
| CA357104   | Ubiquitin-conjugating enzyme E2-18 kDa | 1.05 | 0.55  | NS    | -0.41 | 0.63 | NS    | NS    | NS   |
| CU070548   | Glucose-6-phosphatase                  | 1.03 | 0.42  | NS    | -0.23 | 0.76 | NS    | -0.81 | 0.99 |

|           |                                          |      |       |       |       |       |       |       |       |
|-----------|------------------------------------------|------|-------|-------|-------|-------|-------|-------|-------|
| CA380185  | ERO1-like protein alpha precursor        | 0.98 | NS    | 0.41  | NS    | NS    | NS    | NS    | 0.51  |
| CX723308  | 10 kDa heat shock protein, mitochondrial | 0.98 | 0.35  | NS    | -0.75 | 0.50  | NS    | NS    | NS    |
| EXOB1_F02 | Transcription regulator protein BACH1    | 0.93 | NS    | -0.29 | -0.63 | 1.11  | NS    | -1.27 | 1.14  |
| EG847896  | Transposase-6                            | 0.92 | NS    | -0.14 | -1.59 | NS    | NS    | -1.40 | 0.90  |
| CU066444  | Caspase recruitment domain protein 4     | 0.92 | 0.63  | 0.38  | NS    | 0.51  | NS    | NS    | NS    |
| CX136217  | ReO_6-2                                  | 0.91 | 0.42  | 0.20  | -2.63 | 1.06  | NS    | -0.61 | 0.91  |
| CA042733  | Unknown-226                              | 0.87 | 0.91  | NS    | NS    | NS    | NS    | -0.51 | NS    |
| CA346769  | Transposase-3                            | 0.85 | 0.37  | NS    | -0.98 | NS    | NS    | NS    | NS    |
| CX354900  | Transposase-59                           | 0.84 | 0.47  | NS    | -1.22 | 0.65  | NS    | -0.36 | NS    |
| CB485825  | Unknown-173                              | 0.82 | NS    | NS    | NS    | 0.64  | 0.16  | -0.55 | 0.82  |
| CB510677  | Endoplasmic reticulum calcium ATPase     | 0.79 | 0.76  | NS    | -1.21 | 0.45  | NS    | -0.64 | 0.37  |
| CA342691  | Lanosterol synthase                      | 0.76 | NS    | 0.21  | -1.03 | NS    | NS    | NS    | NS    |
| DW537469  | Transposase-7                            | 0.76 | NS    | NS    | -0.41 | 1.16  | NS    | -0.69 | 0.59  |
| CA354715  | Membrane copper amine oxidase            | 0.74 | NS    | 0.17  | -0.94 | NS    | NS    | NS    | NS    |
| CA381625  | Zinc finger protein 148                  | 0.73 | 0.25  | 0.21  | -1.61 | 0.50  | NS    | -0.33 | NS    |
| CA366462  | Apoptosis regulator Bcl-X                | 0.70 | 0.27  | NS    | NS    | 0.51  | NS    | NS    | NS    |
| EG902807  | Unknown-29                               | 0.70 | NS    | NS    | -0.72 | -0.23 | NS    | NS    | NS    |
| CA376978  | CD2 binding protein 1-2                  | 0.67 | NS    | 0.45  | -0.82 | NS    | NS    | NS    | NS    |
| DY695669  | Unknown-259                              | 0.66 | 0.33  | NS    | -1.65 | 0.46  | NS    | NS    | 0.50  |
| EL554139  | Unknown-65                               | 0.64 | 0.76  | NS    | -0.69 | NS    | NS    | NS    | -0.50 |
| EXOB3_A11 | Unknown-107                              | 0.64 | 0.36  | NS    | NS    | NS    | NS    | NS    | 0.65  |
| CT571685  | Unknown-188                              | 0.63 | NS    | NS    | -1.48 | 0.55  | NS    | -0.32 | NS    |
| EG771865  | Unknown-4                                | 0.60 | -0.28 | 0.42  | 0.67  | 0.48  | -0.52 | NS    | 0.60  |

|            |                                              |      |       |       |       |       |      |       |       |
|------------|----------------------------------------------|------|-------|-------|-------|-------|------|-------|-------|
| CX260228   | Hypothetical-fish 5                          | 0.58 | NS    | 0.49  | -0.65 | 0.73  | NS   | NS    | 0.39  |
| BX859475   | Unknown-146                                  | 0.57 | 0.44  | NS    | NS    | NS    | NS   | -0.58 | NS    |
| BX084962   | HIRA-interacting protein 5                   | 0.57 | 0.44  | NS    | NS    | -0.56 | NS   | 0.33  | NS    |
| CA344201   | Peroxisomal targeting signal 2 receptor      | 0.57 | NS    | NS    | -1.00 | 0.97  | NS   | -0.75 | 0.52  |
| EL552294   | ADP,ATP carrier protein 3                    | 0.56 | NS    | -0.50 | -0.94 | 0.55  | NS   | NS    | 0.35  |
| BX076826   | Unknown-113                                  | 0.55 | -0.19 | NS    | -1.33 | 0.58  | NS   | -0.29 | 0.56  |
| CA384452   | Heat shock protein HSP 90-alpha              | 0.55 | -0.21 | NS    | -1.03 | 0.71  | NS   | -0.28 | NS    |
| CA361342   | Orphan nuclear receptor NR4A2                | 0.54 | NS    | NS    | -0.65 | NS    | NS   | NS    | 0.24  |
| CA376574   | Peptidyl-prolyl cis-trans isomerase 1        | 0.53 | 0.42  | NS    | NS    | NS    | NS   | NS    | -0.69 |
| CF752415   | Cytochrome c oxidase subunit I-2             | 0.52 | NS    | 0.89  | -0.28 | NS    | 0.39 | 0.62  | NS    |
| CA358266   | T-cell, immune regulator 1, isoform a        | 0.50 | NS    | NS    | -0.69 | 0.60  | NS   | NS    | NS    |
| CA376803   | Serine protease-like protein-2               | 0.49 | 0.77  | 0.18  | NS    | -0.26 | 0.69 | NS    | NS    |
| CR370121   | Axonal transporter of synaptic vesicles      | 0.39 | NS    | NS    | NS    | 0.73  | NS   | -0.49 | 0.61  |
| EG814116   | Cytochrome oxidase subunit III-2             | 0.37 | -0.20 | 1.02  | -0.51 | NS    | 0.44 | 0.45  | 0.78  |
| EG814116   | Cytochrome oxidase subunit III-3             | 0.37 | NS    | 1.00  | -0.83 | -0.42 | NS   | 0.46  | NS    |
| CA037544   | Transposase-58                               | 0.32 | NS    | NS    | -0.42 | 0.50  | NS   | -0.53 | 0.34  |
| CU070060   | Unknown-191                                  | 0.32 | 0.58  | NS    | NS    | -0.56 | 0.27 | 0.29  | -0.43 |
| HK0003_D02 | Unknown-192                                  | 0.30 | 0.63  | NS    | 0.37  | -0.28 | NS   | 0.35  | -1.01 |
| CA354833   | Anti-silencing function 1B                   | 0.30 | NS    | 0.30  | -0.68 | 0.55  | NS   | NS    | NS    |
| CB489166   | Unknown-164                                  | 0.28 | 0.45  | NS    | 0.50  | -0.53 | 0.39 | 0.31  | -0.70 |
| CX026828   | Cathepsin C-3                                | 0.27 | 0.77  | 0.25  | NS    | NS    | 0.56 | NS    | -0.52 |
| CX153181   | Nucleoside diphosphate kinase, mitochondrial | 0.25 | -0.55 | 0.16  | -1.61 | 1.25  | NS   | -0.76 | 1.05  |
| BX079000   | T-complex protein 1, gamma subunit           | 0.21 | 0.55  | 0.29  | NS    | NS    | 0.79 | 0.26  | NS    |

|           |                                                  |       |       |       |       |       |       |       |       |
|-----------|--------------------------------------------------|-------|-------|-------|-------|-------|-------|-------|-------|
| CX151839  | TGF beta-inducible nuclear protein 1             | 0.19  | 0.74  | 0.15  | 0.51  | -0.45 | 0.87  | 0.20  | -0.42 |
| CA367029  | Rho guanine nucleotide exchange factor 5         | 0.18  | -0.60 | 0.19  | -1.36 | 0.81  | -0.16 | NS    | 0.65  |
| EV381307  | Unknown-166                                      | -0.16 | 0.41  | NS    | 0.31  | -0.53 | NS    | 0.22  | -0.88 |
| CA363848  | p53-regulated protein PA26                       | -0.17 | -0.20 | NS    | -0.64 | 0.53  | NS    | NS    | 0.59  |
| CX254566  | Unknown-76                                       | -0.24 | -0.49 | -0.36 | NS    | 0.92  | NS    | -0.59 | 0.66  |
| CX137254  | Hyperosmotic protein 21                          | -0.28 | 0.37  | NS    | 0.66  | NS    | 0.69  | NS    | NS    |
| CA374217  | Alpha-globin 1-3 Omy 8146                        | -0.30 | NS    | NS    | 0.56  | NS    | NS    | 0.43  | -0.55 |
| BX082487  | Unknown-182                                      | -0.36 | -0.81 | -0.74 | NS    | 1.25  | NS    | -1.32 | 1.58  |
| EG355201  | Stanniocalcin-1                                  | -0.36 | -0.90 | -0.41 | -0.38 | 0.76  | -0.79 | -0.90 | 1.21  |
| EXOB3_A01 | Unknown-103                                      | -0.36 | -1.15 | -0.63 | NS    | 1.39  | -0.60 | -1.14 | 0.99  |
| EV378274  | Adenosine deaminase 3                            | -0.38 | -1.00 | -0.68 | NS    | 1.29  | NS    | -0.88 | NS    |
| CX138552  | Histone 3A-ATP synthase F0 6                     | -0.39 | 0.38  | NS    | 0.51  | -0.35 | NS    | 0.78  | -0.42 |
| CA358107  | Ectonucleoside triphosphate diphosphohydrolase 1 | -0.40 | -1.08 | -0.59 | NS    | 1.19  | -0.40 | -0.95 | 1.26  |
| est04c02  | Unknown-53                                       | -0.46 | -1.24 | -0.77 | NS    | 1.23  | -0.53 | -1.20 | 1.48  |
| BX082905  | Splicing factor 3B subunit 1                     | -0.47 | -1.07 | NS    | -0.27 | 0.66  | NS    | NS    | NS    |
| CX245881  | Apolipoprotein A-I-1                             | -0.48 | -0.78 | -0.42 | 0.50  | 0.32  | -0.50 | -0.61 | 1.05  |
| CX144622  | Unknown-174                                      | -0.53 | NS    | NS    | 0.47  | -0.50 | NS    | 0.43  | -1.20 |
| est04c10  | Unknown-56                                       | -0.55 | -1.89 | -0.35 | 0.37  | 1.10  | -1.11 | -0.80 | 1.47  |
| CA368674  | Organic anion transporter                        | -0.57 | NS    | NS    | 0.72  | NS    | 0.44  | 0.55  | -0.74 |
| EG914743  | Unknown-270                                      | -0.60 | NS    | NS    | 0.90  | NS    | 0.31  | 0.93  | -0.67 |
| DV191325  | High-mobility group box 1                        | -0.61 | -1.49 | 0.91  | NS    | NS    | NS    | NS    | NS    |
| BX307506  | NADH-ubiquinone oxidoreductase 15 kDa subunit    | -0.62 | 0.29  | NS    | 0.56  | NS    | 0.32  | 0.47  | NS    |
| CA366403  | Heat shock 27 kDa protein-1                      | -0.71 | -2.01 | -0.43 | 0.31  | 1.69  | -0.78 | -0.79 | 1.40  |

|           |                                        |       |       |       |      |       |       |       |       |
|-----------|----------------------------------------|-------|-------|-------|------|-------|-------|-------|-------|
| EV378980  | Alpha-2,8-sialyltransferase 8F         | -0.72 | -1.58 | NS    | NS   | 0.67  | -0.30 | -0.56 | NS    |
| EG841423  | Chromosome segregation 1-like protein  | -0.75 | NS    | NS    | 1.02 | NS    | 0.50  | 0.57  | -0.56 |
| BX299891  | Hypothetical-fish 9                    | -0.76 | NS    | NS    | 0.70 | -0.38 | 0.28  | 0.62  | NS    |
| CX252245  | Hypothetical-fish 34                   | -0.79 | -0.71 | NS    | NS   | 0.54  | -0.71 | -0.57 | 0.75  |
| CX144401  | Proteasome subunit alpha type 6        | -0.80 | NS    | NS    | 0.83 | NS    | NS    | 0.68  | NS    |
| EXOB1_D07 | Unknown-84                             | -0.81 | -0.78 | NS    | NS   | 0.72  | NS    | -0.33 | 0.53  |
| CU063794  | Unknown-85                             | -0.83 | -0.55 | -0.21 | 0.42 | NS    | NS    | 0.33  | NS    |
| CA366162  | Ribosomal protein L35-1                | -0.90 | NS    | NS    | 0.98 | NS    | NS    | 0.51  | NS    |
| EXOB3_E06 | Unknown-115                            | -0.95 | NS    | -0.11 | 0.50 | NS    | NS    | 0.55  | NS    |
| P_8       | Glutathione reductase, mitochondrial-1 | -1.19 | -0.61 | -0.53 | NS   | NS    | NS    | -0.57 | 0.52  |
| BX303958  | SEC13-related protein                  | -1.36 | -0.31 | NS    | 0.81 | NS    | NS    | 0.67  | -0.43 |
| BX871577  | Unknown-124                            | -1.38 | NS    | NS    | 0.82 | NS    | 0.45  | 0.45  | NS    |
| DW540724  | Fish-egg lectin                        | -1.42 | -0.34 | -0.38 | 1.18 | NS    | 0.42  | 0.48  | NS    |
| BX875072  | Fatty acid-binding protein-1           | -1.47 | NS    | NS    | 1.11 | NS    | NS    | 0.71  | NS    |
| DW576495  | Transposase-56                         | -1.56 | -3.03 | -0.16 | NS   | 0.97  | -1.03 | -0.80 | NS    |
| P_17      | Nitric oxide synthase 2 (NOS2)         | -1.75 | -1.09 | -0.87 | NS   | 0.39  | -0.45 | -0.67 | NS    |
| CV428774  | Cytochrome c oxidase subunit II        | -1.91 | -0.57 | 0.50  | 0.77 | NS    | NS    | 0.66  | NS    |
