# Supplementary material for: Do historical sediments of pulp and paper industry contribute to the exposure of fish caged in receiving waters?
Source: Royal Society of Chemistry journal article supplement (doi:10.1039/b922532c), 2010-01-01
Supplement: b922532c-2.pdf [file b922532c-2.pdf]

Supplementary data

Table 2. Composition of two groups of genes with correlated expression profiles in the liver of juvenile brown trout exposed for 10 days at various distances from the pulp and paper mill “Kaukas” and at two depths of water in comparison with the reference site -10 km upstream.

| Accession      | Gene                                              | Pearson $r^1$ |
|----------------|---------------------------------------------------|---------------|
| <b>Group A</b> |                                                   |               |
| CX723308       | 10 kDa heat shock protein, mitochondrial          | 0.93          |
| EL552294       | ADP,ATP carrier protein 3                         | 0.93          |
| CA354833       | Anti-silencing function 1B                        | 0.85          |
| CA366462       | Apoptosis regulator Bcl-X                         | 0.88          |
| CR370121       | Axonal transporter of synaptic vesicles           | 0.80          |
| CA376978       | CD2 binding protein 1-2                           | 0.86          |
| CA383564       | Coatomer epsilon subunit 1                        | 0.98          |
| CA380185       | ERO1-like protein alpha precursor                 | 0.91          |
| CU070548       | Glucose-6-phosphatase                             | 0.84          |
| CA384452       | Heat shock protein HSP 90-alpha                   | 0.93          |
| DW564653       | Hpa repeat-1                                      | 0.92          |
| CR370883       | Hpa repeat-2                                      | 0.94          |
| CX260228       | Hypothetical-fish 5                               | 0.88          |
| CA342691       | Lanosterol synthase                               | 0.90          |
| BX859583       | Megakaryocyte stimulating factor                  | 0.86          |
| CA354715       | Membrane copper amine oxidase                     | 0.89          |
| CA382570       | Mitogen-activated protein kinase 13               | 0.91          |
| CX153181       | Nucleoside diphosphate kinase, mitochondrial      | 0.83          |
| CA361342       | Orphan nuclear receptor NR4A2                     | 0.91          |
| DY710914       | Peptidyl-prolyl cis-trans isomerase-7             | 0.94          |
| CA344201       | Peroxisomal targeting signal 2 receptor           | 0.92          |
| CA346691       | ReO_6-1                                           | 0.91          |
| CX136217       | ReO_6-2                                           | 0.96          |
| CB510677       | Sarcoplasmic/endoplasmic reticulum calcium ATPase | 0.94          |

|                |                                                  |      |
|----------------|--------------------------------------------------|------|
| CA358266       | T-cell, immune regulator 1, isoform a            | 0.92 |
| EXOB1_F02      | Transcription regulator protein BACH1            | 0.84 |
| DY737056       | Transposase-1                                    | 0.88 |
| CA040613       | Transposase-4                                    | 0.97 |
| CX717338       | Transposase-5                                    | 0.94 |
| CA037544       | Transposase-58                                   | 0.89 |
| CX354900       | Transposase-59                                   | 0.90 |
| EG847896       | Transposase-6                                    | 0.95 |
| DW537469       | Transposase-7                                    | 0.87 |
| CA357217       | Ubiquitin ligase protein CHFR                    | 0.95 |
| CA357104       | Ubiquitin-conjugating enzyme E2-18 kDa           | 0.92 |
| EXOB3_A11      | Unknown-107                                      | 0.94 |
| BX076826       | Unknown-113                                      | 0.93 |
| EXOB3_E03      | Unknown-114                                      | 0.99 |
| CB485825       | Unknown-173                                      | 0.82 |
| CT571685       | Unknown-188                                      | 0.95 |
| CA038503       | Unknown-218                                      | 0.87 |
| CK873537       | Unknown-220                                      | 0.86 |
| KVkm2_F01      | Unknown-224                                      | 0.98 |
| utu02d01       | Unknown-241                                      | 0.88 |
| DY695669       | Unknown-259                                      | 0.93 |
| CR372483       | Unknown-33                                       | 0.91 |
| DY720828       | Unknown-70                                       | 1.00 |
| EL558025       | Unknown-75                                       | 0.97 |
| CA381625       | Zinc finger protein 148                          | 0.95 |
| <b>Group B</b> |                                                  |      |
| EV378274       | Adenosine deaminase 3                            | 0.90 |
| EV378980       | Alpha-2,8-sialyltransferase 8F                   | 0.88 |
| CX245881       | Apolipoprotein A-I-1                             | 0.90 |
| DY737446       | Apolipoprotein A-IV                              | 0.94 |
| CA348325       | BAG-family molecular chaperone regulator-4       | 0.84 |
| CA358725       | Cytosolic nonspecific dipeptidase                | 0.94 |
| CA358107       | Ectonucleoside triphosphate diphosphohydrolase 1 | 0.99 |

|            |                                                     |      |
|------------|-----------------------------------------------------|------|
| DV200529   | Fructose-bisphosphate aldolase A                    | 0.93 |
| CA353121   | GRB2-related adaptor protein 2                      | 0.98 |
| CA366403   | Heat shock 27 kDa protein-1                         | 0.98 |
| CX252245   | Hypothetical-fish 34                                | 0.91 |
| CA375247   | Hypothetical-fish 36                                | 0.83 |
| BX076136   | Hypoxanthine-guanine phosphoribosyltransferase      | 0.79 |
| ES325958   | Lysozyme cluster                                    | 0.84 |
| CX151724   | Macrophage receptor MARCO                           | 0.96 |
| CA368716   | Membrane-bound transcription factor site 2 protease | 0.84 |
| EG756231   | NADH dehydrogenase subunit 5-2                      | 0.97 |
| CA357173   | Peptidyl-prolyl cis-trans isomerase 2-2             | 0.97 |
| BX084567   | PEST-containing nuclear protein                     | 0.94 |
| BX082905   | Splicing factor 3B subunit 1                        | 0.79 |
| EG355201   | Stanniocalcin-1                                     | 0.96 |
| DW576495   | Transposase-56                                      | 0.86 |
| EXOB3_A01  | Unknown-103                                         | 0.98 |
| BX882217   | Unknown-132                                         | 0.91 |
| BX082487   | Unknown-182                                         | 0.95 |
| CA387618   | Unknown-223                                         | 0.89 |
| est04c02   | Unknown-53                                          | 0.99 |
| est04c10   | Unknown-56                                          | 0.96 |
| EST1-3AG03 | Unknown-74                                          | 0.92 |
| CX254566   | Unknown-76                                          | 0.96 |
| EXOB1_D07  | Unknown-84                                          | 0.89 |

<sup>1</sup>Correlation with the mean expression profiles
